# Supplementary material
Source: PubMed Central journal article supplement (PMC4874856)
Supplement: NIHMS758355-supplement-Supp_Info.pdf [file NIHMS758355-supplement-Supp_Info.pdf]

## Supporting Information

### Multidimensional Screening Platform for Simultaneously Targeting Oncogenic KRAS and Hypoxia-Inducible Factors Pathways in Colorectal Cancer

Michelle S. Bousquet,<sup>†,‡,⊥</sup> Jia Jia Ma,<sup>⊥</sup> Ranjala Ratnayake,<sup>†,‡</sup> Pamela A. Havre,<sup>†,‡</sup> Jin Yao,<sup>§</sup> Nam H. Dang,<sup>⊥</sup> Valerie J. Paul,<sup>Δ</sup> Thomas J. Carney,<sup>⊥,⊙</sup> Long H. Dang,<sup>†,‡,⊥</sup> Hendrik Luesch<sup>\*,†,‡,⊥</sup>

<sup>†</sup>Department of Medicinal Chemistry, <sup>‡</sup>Center for Natural Products, Drug Discovery and Development (CNP3), <sup>§</sup>Department of Electrical and Computer Engineering, <sup>⊥</sup>Department of Medicine, University of Florida, Gainesville, Florida 32610, United States

<sup>⊥</sup>Institute of Molecular and Cell Biology (IMCB), A\*STAR, Proteos, Singapore 138673, Singapore

<sup>Δ</sup>Smithsonian Marine Station, 701 Seaway Drive, Fort Pierce, Florida 34949, United States

<sup>⊙</sup>Lee Kong Chian School of Medicine, Nanyang Technological University, 59 Nanyang Drive, 636921, Singapore

| <b>Contents</b>                                                     | <b>Page Number</b> |
|---------------------------------------------------------------------|--------------------|
| Supplementary Results                                               | S2                 |
| Supplementary Materials and Methods                                 | S3-S5              |
| Figure S1a-b. Isogenic cell line credentialing                      | S5                 |
| Figure S2a-b. HIF Target and Signaling Pathway                      | S7-8               |
| Figure S3. Nucleotide Excision Repair Pathway                       | S9                 |
| Figure S4. Upstream Regulators                                      | S9                 |
| Figure S5a-e. Dose-response of Top 55 Drugs                         | S10-14             |
| Table S1a-b. Gene Perturbations in HIF Pathway                      | S15-16             |
| Table S2. siRNA Gene List                                           | S17                |
| Table S3a-b. Canonical Pathways                                     | S18                |
| Table S4. Networks                                                  | S19                |
| Table S5. Top Diseases and Biofunctions                             | S20                |
| Table S6. Comparison with Known Synthetic Lethals                   | S21                |
| Table S5. IC <sub>50</sub> and Efficacy Shifts for Top 55 Compounds | S22                |
| Supplemental References                                             | S23                |

## SUPPLEMENTAL RESULTS

Upstream analysis of genes with a minimum of 2 active siRNAs predict that RICTOR, a subunit of mTORC2, is a major upstream regulator of the HIF and KRAS pathways (**Supplementary Figure S3**). mTORC2 is involved in actin cytoskeletal rearrangement<sup>1,2</sup>. mTORC induces oncogenic AKT1 'Ser-473' phosphorylation, possibly facilitating the activating AKT1 activation loop phosphorylation on 'Thr-308' by PDK1<sup>3</sup>. It has been previously shown that inhibition of the PI3K/Akt pathway using BEZ-235, a small molecule inhibitor of Pdk1/mTORC1, that prototypic arenavirus lymphocytic choriomeningitis virus (LCMV) budding is also inhibited, demonstrating overlap between these prolific processes<sup>4</sup>. Phosphorylation of PRKCA on 'Ser-657' is also modulated by the mTORC2 complex<sup>3</sup>. PRKCA has been associated with a decrease in apoptosis by p53/TP53-mediated activation of IGF1R in glioma cells<sup>5</sup> as well as by phosphorylation of BCL2 in leukemia<sup>6</sup>. Additionally, PRKCA has been previously demonstrated roles in angiogenesis<sup>7</sup> (74), cell migration<sup>8</sup>, adhesion<sup>9</sup>, VEGFA mRNA stability and VEGFA-induced cell proliferation<sup>10</sup>, and inflammatory responses via the LPS and NFkB pathway<sup>11,12</sup>. GO analysis also revealed that numerous of the top shared genes have functionality in DNA damage checkpoints, a function also largely regulated by PRKCA<sup>13</sup>. Ubiquitin protein ligase and transferase activity is also among the top biological processes as determined by GO, while IPA highlighted the protein ubiquitination pathway as a top canonical pathway among hits.

## SUPPLEMENTAL MATERIALS AND METHODS

**Gene Expression Profiling.** HCT116, HCT116<sup>HIF-1 $\alpha$ -/-</sup>, HCT116<sup>HIF-2 $\alpha$ -/-</sup>, HCT116<sup>HIF-1 $\alpha$ -/-HIF-2 $\alpha$ -/-</sup>, and HCT116<sup>WT KRAS</sup> cells were seeded at low density 5000 cells per well on 6-well tissue culture plates and allowed to grow undisturbed at 37°C, in 5% CO<sub>2</sub> for 10 days. Cells were then harvested and total RNA extracted. Gene expression analyses on the samples were performed at the University of Michigan Comprehensive Cancer Center Affymetrix Core Facility. Commercial high-density oligonucleotide arrays were used (GeneChip Human Genome U133A; Affymetrix, Inc., Santa Clara, CA), following protocols and methods developed by the supplier.

**Credentialing Isogenic Cell Lines for HIF and KRAS Targets** Each isogenic cell line was grown to full confluency at 37°C, in 5% CO<sub>2</sub>. VEGFA levels were evaluated using VEGFA AlphaLISA kit (PerkinElmer) in 6-well dishes using standard protocol. Protein was then isolated from the same cells (concentration of which was used to normalize VEGFA). Immunoblot analysis was used to evaluate relative LDHA levels between isogenic lines.

**Genomic siRNA Screen.** The siRNA library targeting 7,784 genes of the druggable human genome with quadruplicate coverage (four individual siRNAs for each gene) arrayed in 96-well format (*Silencer*<sup>®</sup> Human Druggable Genome siRNA Library V3.1) was obtained from Ambion/Life Technologies (Grand Island, NY). The siRNAs were spotted into 384-well screening sets. HCT116 (1 x 10<sup>3</sup> cells/well), HCT116<sup>HIF-1 $\alpha$ -/-HIF-2 $\alpha$ -/-</sup> (1.5 x 10<sup>3</sup> cells/well), and HCT116<sup>WT KRAS</sup> (3 x 10<sup>3</sup> cells/well) were retro-transfected with 20 nM of siRNAs using siLentFect (Bio-Rad, Hercules, CA). The plates were incubated at 37°C and 5% CO<sub>2</sub> for 96 h. Cell viability was detected using ATPlite 1step according to the manufacturer's instructions (PerkinElmer, Waltham, MA). Individual siRNAs were plotted by their relative percent cell viability in HCT116 versus HCT116<sup>HIF-1 $\alpha$ -/-HIF-2 $\alpha$ -/-</sup> or HCT116<sup>WT KRAS</sup> cell lines. High-confidence hits from the siRNA library screen were identified as those where the viability ratio of the wildtype to knockout was <0.6 with  $p < 0.05$  across the four replicates, as determined using a two-tail  $t$ -test. A minimum of two active siRNAs were required for a gene to be considered to have differential toxicity in IPA. Priority for lead pathways, nodes, and functions were given to those genes which had 3 or 4 active siRNAs.

**Ingenuity Pathway Analysis (IPA).** Networks and canonical pathways were generated through the use of QIAGEN's Ingenuity Pathway Analysis (IPA<sup>®</sup>, QIAGEN Redwood City, www.qiagen.com/ingenuity). *Canonical Pathways:* All genes which met the established cutoffs were evaluated for shared canonical pathways. An experimentally set confidence was incorporated with the inclusion of publications from human, mouse, and rat species. A comparison analysis was used to screen for shared canonical pathways amongst hits with differential cytotoxicities in isogenic knockout lines. *Network Analyses:* By comparing the imported differential cytotoxicities of each siRNA, a list of biologically relevant canonical pathways and algorithmically generated mechanistic networks were generated by screening the Ingenuity<sup>®</sup> Knowledge Base. Individual siRNAs were considered hits if the differential cytotoxicity was  $\leq 0.6$  (wt:ko) with a  $p \leq 0.05$  across replicates. Genes were prioritized based on the number of siRNAs which were differentially active. A cut-off of 2 active siRNAs was established for a gene to be considered a hit, with highest priority given to those genes targeted by 3 or 4 active siRNAs. For the network evaluation, all genes which had made the established criteria were uploaded in a dataset with equivalent values to generate a global view of the effected biology void of bias from varying siRNA functionality. Both direct and indirect relationships were considered with an experimentally set confidence with the inclusion of

human, mouse, and rat data. The global network was generated by connecting top networks with a minimum of 5 shared molecules. *Gene Ontology and Kyoto Encyclopedia of Genes and Genomes Analyses*. A 2-fold differential cytotoxicity was used to determine active siRNAs. High confidence hits were identified as genes for which 3 or 4 siRNAs were active towards both HIF and oncogenic KRAS knockout. A total of 176 genes were evaluated using Gene Ontology (GO) and Kyoto Encyclopedia of Genes and Genomes (KEGG) to determine top biological processes and molecular functions shared between active siRNAs.

**Small Molecule Library Screen.** The small molecule libraries were obtained from Sigma-Aldrich (St. Louis, MO), Prestwick Chemical (Illkirch, France), and Microsource Discovery Systems (Gaylordsville, CT). HCT116 ( $1 \times 10^4$  cells/well), HCT116<sup>HIF-1 $\alpha$ -/-HIF-2 $\alpha$ -/-</sup> ( $1 \times 10^4$  cells/well), and HCT116<sup>WT KRAS</sup> ( $2 \times 10^4$  cells/well) were seeded in 96-well plates. The next day, cells were treated with either compound at a concentration of 10  $\mu$ M or solvent control. Cell viability was detected using ATPlite 1Step according to the manufacturer's instructions (PerkinElmer, Waltham, MA). Compounds (261) that showed toxicity or the ratio  $>1.6$  (HCT116<sup>HIF-1 $\alpha$ -/-HIF-2 $\alpha$ -/-</sup> vs HCT116, HCT116<sup>WT KRAS</sup> vs HCT116) were selected for the dose-response validation.

**Dose-Response Cell Viability Assays.** The primary 261 hits HCT116 ( $1 \times 10^4$  cells/well), HCT116<sup>HIF-1 $\alpha$ -/-HIF-2 $\alpha$ -/-</sup> ( $1 \times 10^4$  cells/well), and HCT116<sup>WT KRAS</sup> ( $2 \times 10^4$  cells/well) were seeded in 96-well plates. LoVo and RKO were seeded at  $1 \times 10^4$  cells/well. The next day, cells were treated with various concentrations of the compound or solvent control. After 48 h of incubation, cell viability was detected using ATPlite 1Step according to the manufacturer's instructions (PerkinElmer, Waltham, MA); 55 compounds showed differential activity wherein a differential toxicity of  $\geq 1.99$ -fold (HCT116<sup>HIF-1 $\alpha$ -/-HIF-2 $\alpha$ -/-</sup> vs HCT116, HCT116<sup>WT KRAS</sup> vs HCT116) was seen in at least one concentration for each cell type. HUVECs were seeded (quadruplicate) into a 96-well plate at 3600 cells/well. Following treatment with largazole for 18 h, MTT reagent was added and the absorbance read at 570 nm, according to the manufacturer's instructions (Promega, Madison, WI).

**RT-qPCR Analysis.** HCT116 ( $4 \times 10^5$  cells/well) were seeded in 60-mm dishes. HUVECs were seeded into 6-well plates at 96,000 cells per well. The next day, cells were treated with compound or solvent control for 16 h and then total RNA was extracted with the RNeasy Mini Kit (Qiagen, Valencia, CA). cDNA was synthesized from 2  $\mu$ g of total RNA by using SuperScript II Reverse Transcriptase (Invitrogen/Life Technologies, Grand Island, NY) and Oligo(dT)12-18 Primer (Invitrogen/Life Technologies). Real-time PCR was performed by using the ABI 7300 sequence detection systems (Applied Biosystems/Life Technologies). Each assay was carried out in triplicate.  $\beta$ -Actin expression was used as internal control for normalization.

**Colony Formation Assay.** HCT116 cells were seeded in 6-well dishes at a density of  $1 \times 10^3$  cells/well. The cells were treated with compound or solvent control and allowed to grow undisturbed for 10 d at 37 °C and 5% CO<sub>2</sub>. Colony formation was determined by staining with crystal violet (Sigma-Aldrich, St. Louis, MO).

**Immunoblot Analysis.** HCT116 cells were plated in 60-mm dishes at a density of  $4 \times 10^5$  cells/well. The next day, cells were given the treatment of compound or solvent control. 16 h later, whole cell lysates were collected using PhosphoSafe buffer (EMD Chemicals, Inc, Gibbstown,

NJ). Protein concentrations were measured with the BCA Protein Assay kit (Thermo Fisher Scientific, Rockford, IL). Lysates containing equal amounts of protein were separated by SDS polyacrylamide gel electrophoresis (4–12%), transferred to polyvinylidene difluoride membranes, probed with primary and secondary antibodies, and detected with the SuperSignal West Femto Maximum Sensitivity Substrate (Thermo Fisher Scientific). Anti-HIF-1 $\alpha$  antibody was obtained from BD Biosciences (San Jose, CA). Anti-HIF-1 $\beta$ ,  $\beta$ -actin, and secondary anti-mouse and rabbit antibodies were from Cell Signaling Technology, Inc (Danvers, MA).

**Angiogenesis Assay.** Huvec cells (Lonza) were seeded into a 24-well plate coated with 0.1 ml Basement membrane matrix (Invitrogen) at 125,000 cells per well. Largazole, solubilized in ethanol was added at the concentrations indicated. Following an 18 h incubation, three images were captured for each treatment using a Nikon inverted microscope equipped with NIS-Elements software. Branch points were counted for each image and averaged.

**Zebrafish Experiments.** Zebrafish used for analysis were obtained from natural crosses of the AB wild-type strain or *vhl*<sup>+/*hu2117*</sup> carriers on the *flil1a:egfp*<sup>y1</sup> transgenic background (which fluorescently marks the vasculature<sup>14</sup>). Fish were housed in the IMCB Zebrafish facility and embryos staged according to Kimmel et al<sup>15</sup>. Largazole was dissolved in DMSO and applied to embryos at either 500 nM or 2  $\mu$ M, with 0.5% DMSO carrier used for control experiments. Following mounting in low-melting point agarose, the tail vascular plexus was imaged on a Zeiss LSM700 confocal microscope, whilst brightfield images were captured with a Leica MZ16FA.

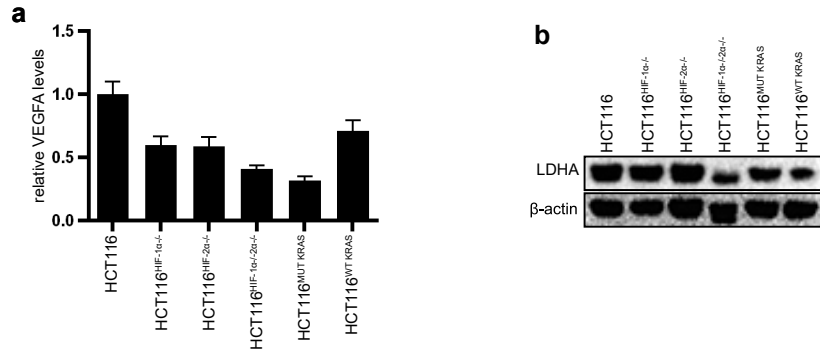

**Figure S1.** Isogenic cell lines of HCT116 contain decreased levels of HIF-regulated proteins. All isogenic lines contain a decrease in VEGFA relative to the parental line (a) and HCT116<sup>HIF-1α</sup>-/-HIF-2α-/- and HCT116<sup>WT KRAS</sup> cells contain similarly decreased levels of LDHA protein (b).

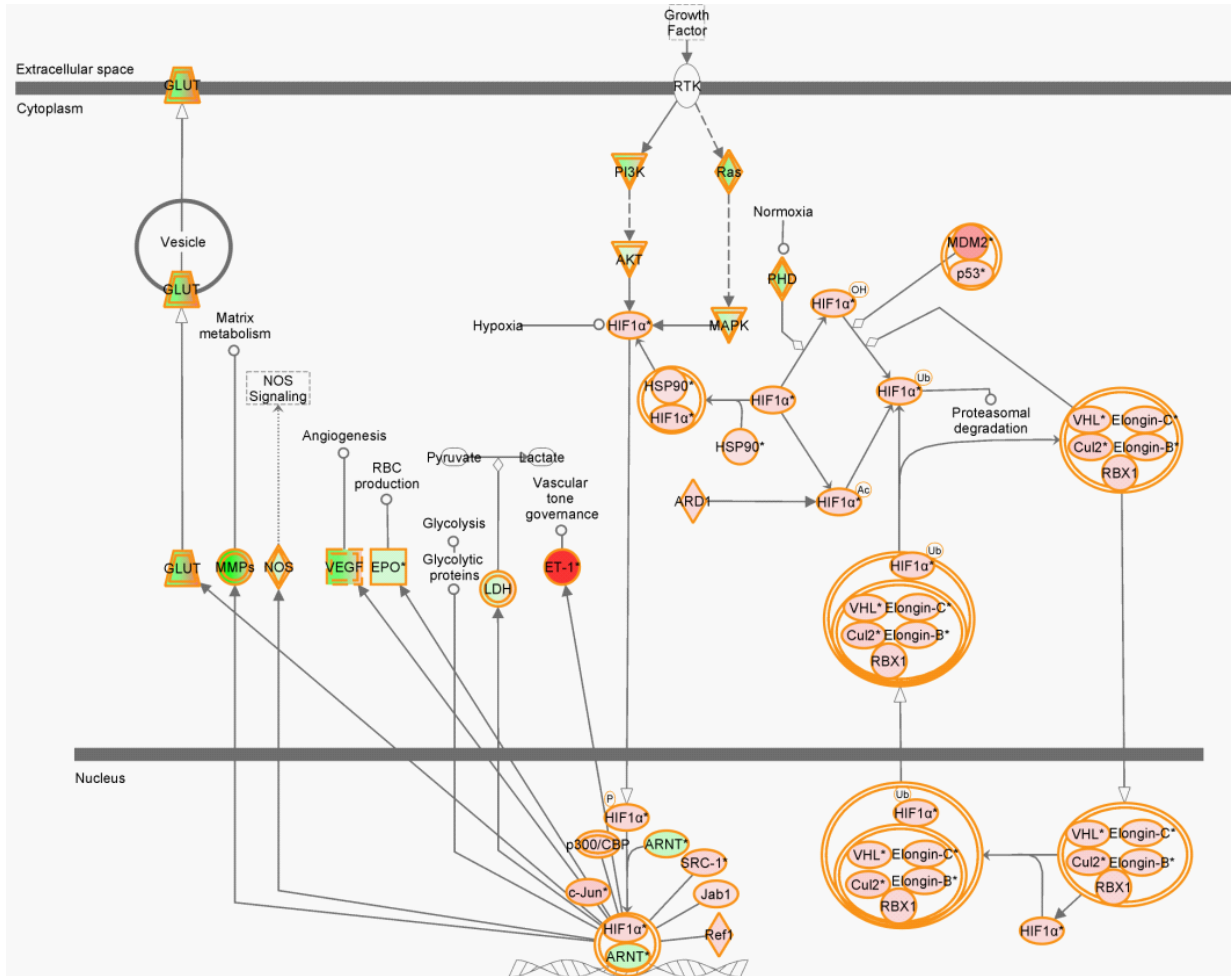

**Figure S2a.** HCT116<sup>HIF-1 $\alpha$ -/-HIF2- $\alpha$ -/-</sup> and HCT116<sup>WT KRAS</sup> demonstrate similar affects on genes within the HIF-1 $\alpha$  signaling pathway. Comparison of the HCT116 and HCT116<sup>HIF-1 $\alpha$ -/-HIF2- $\alpha$ -/-</sup> expression profiles reveals genes which are upregulated (red) and downregulated (green) within the pathway. Color intensity correlates with the logarithmic fold induction of a gene. Symbols colored both red and green represent complexes wherein members demonstrate different relative gene expression changes.

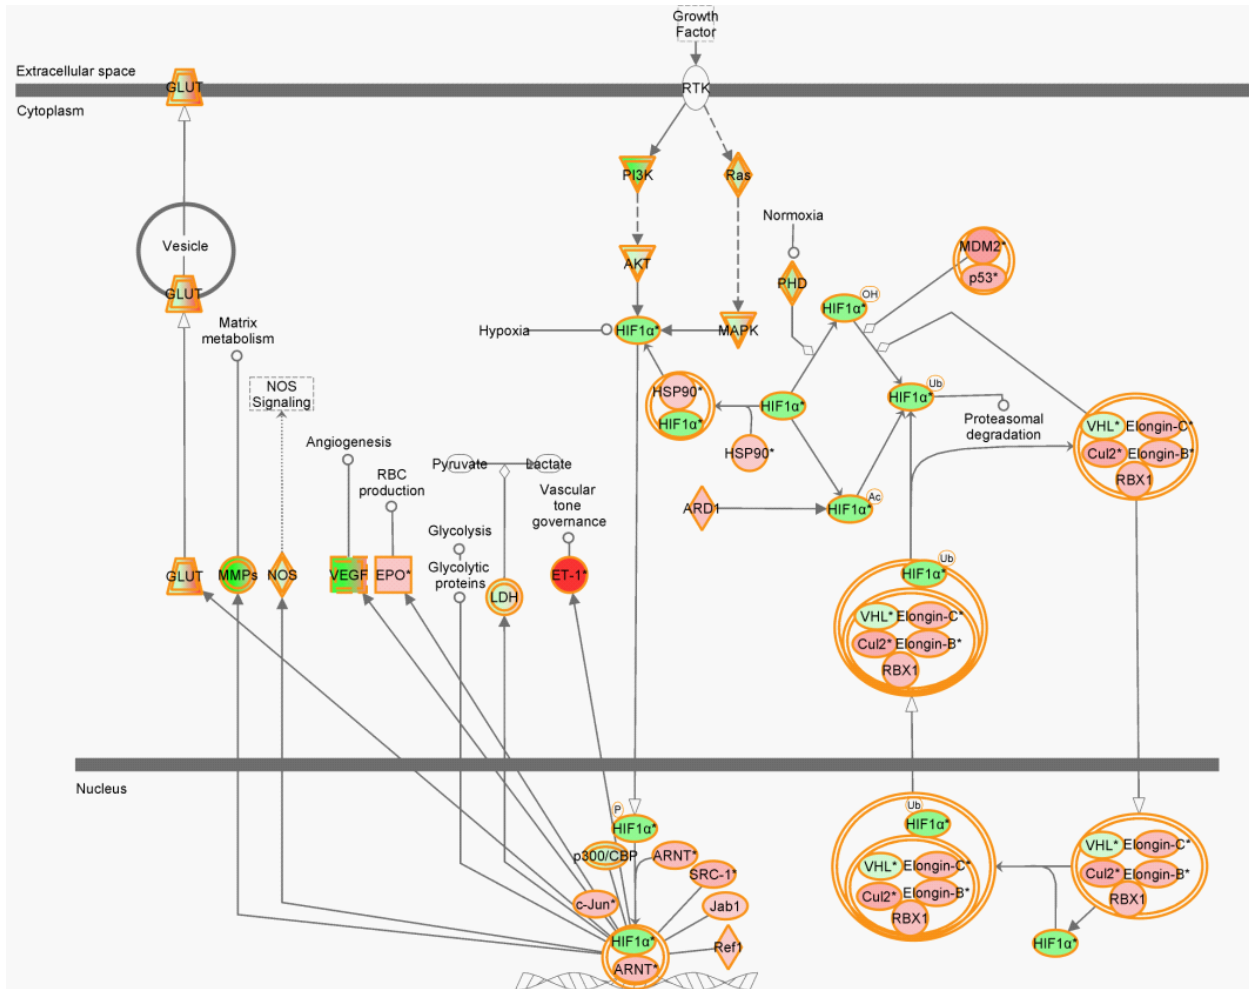

**Figure S2b.** HCT116<sup>HIF-1α<sup>-/-</sup>HIF2-α<sup>-/-</sup></sup> and HCT116<sup>WT KRAS</sup> demonstrate similar effects on genes within the HIF-1α signaling pathway. Comparison of the HCT116 and HCT116<sup>KRAS</sup> expression profiles reveals genes which are upregulated (red) and downregulated (green) within the pathway. Color intensity correlates with the logarithmic fold induction of a gene. Symbols colored both red and green represent complexes wherein members demonstrate different relative gene expression changes.



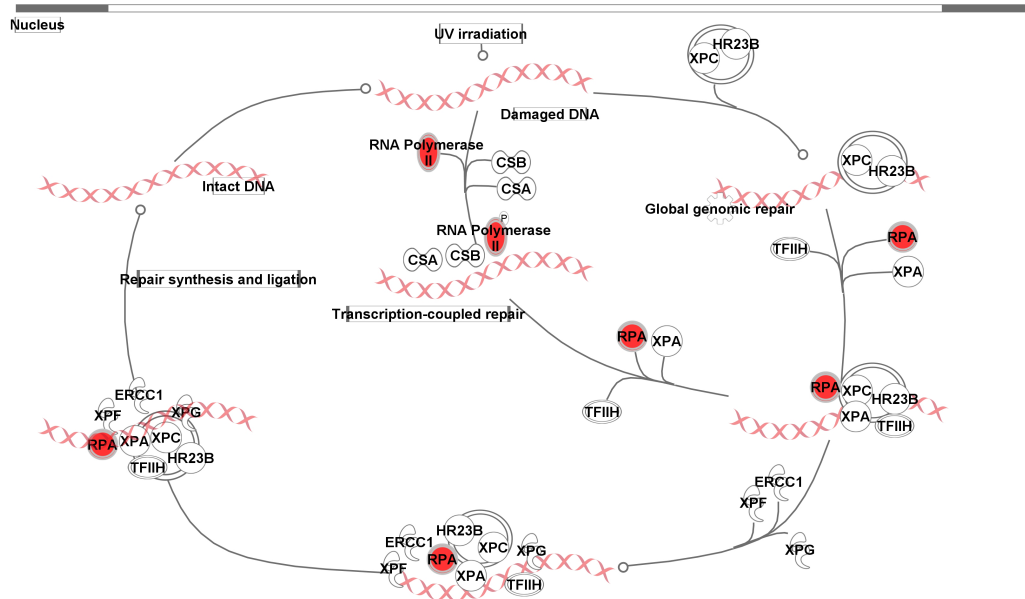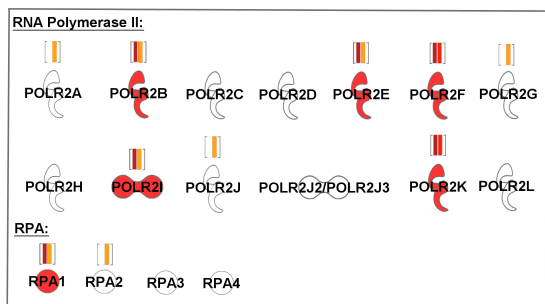

**Figure S3.** IPA analysis of canonical pathways reveals that siRNAs associated with HIF (red) or KRAS (orange) activity are involved in the nucleotide excision repair pathway.

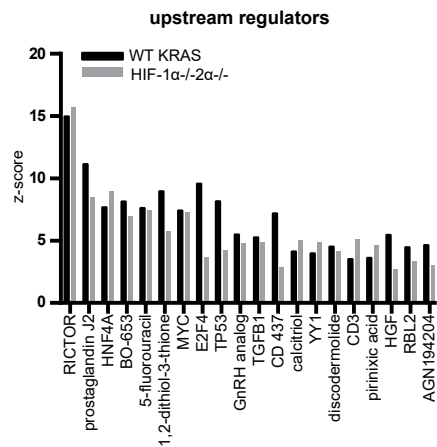

**Figure S4.** IPA analysis of active siRNAs reveal several common upstream regulators, ranked by activation z-score using Ingenuity comparison analysis.

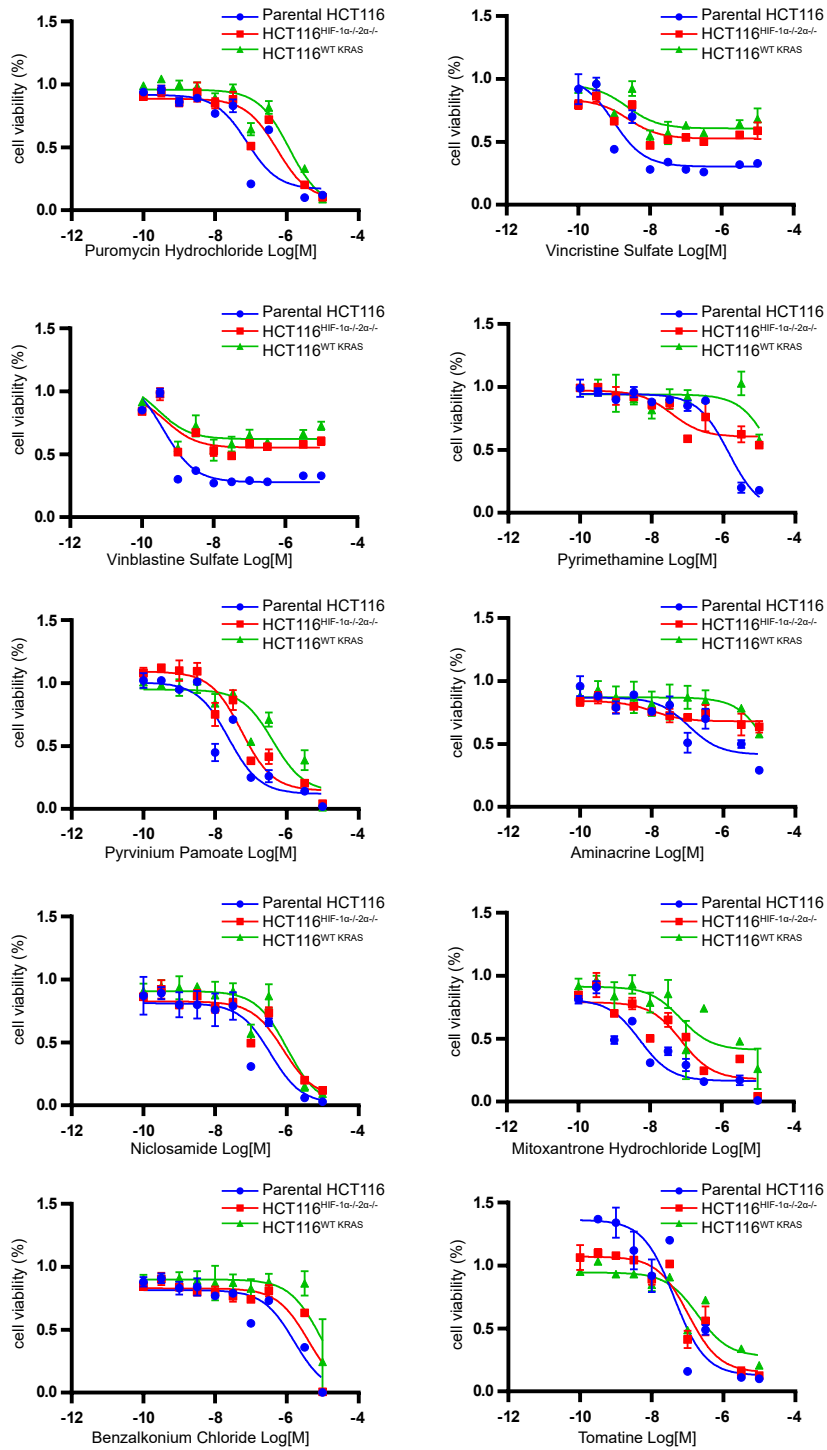

**Figure S5a.** Dose-response analysis of remaining top 55 drugs (drugs 6-15) showing differential toxicity and efficacy trends (see corresponding SupplementaryTable S7).

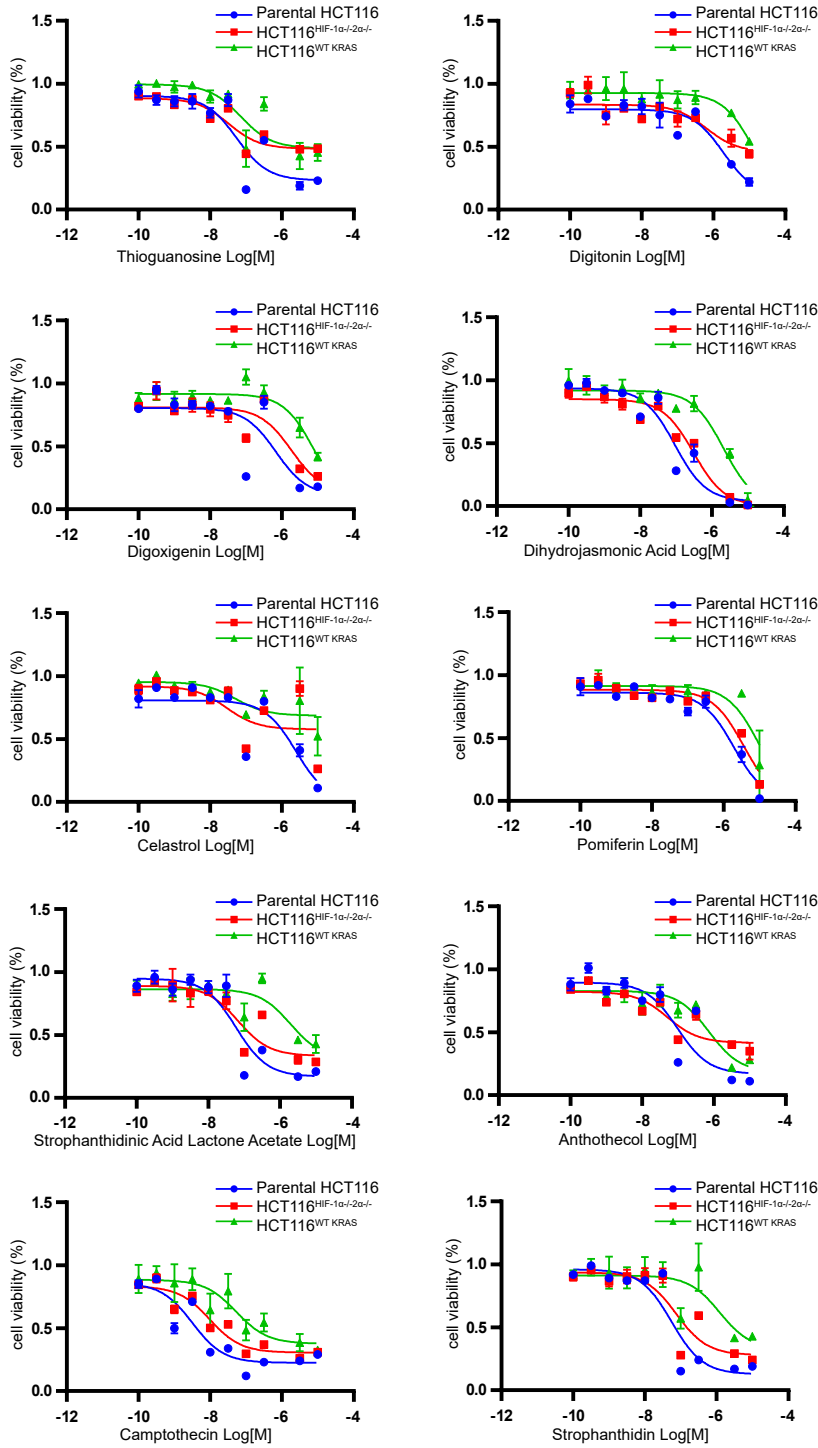

**Figure S5b.** Dose-response analysis of remaining top 55 drugs (drugs 16-25) showing differential toxicity and efficacy trends (see corresponding SupplementaryTable S7).

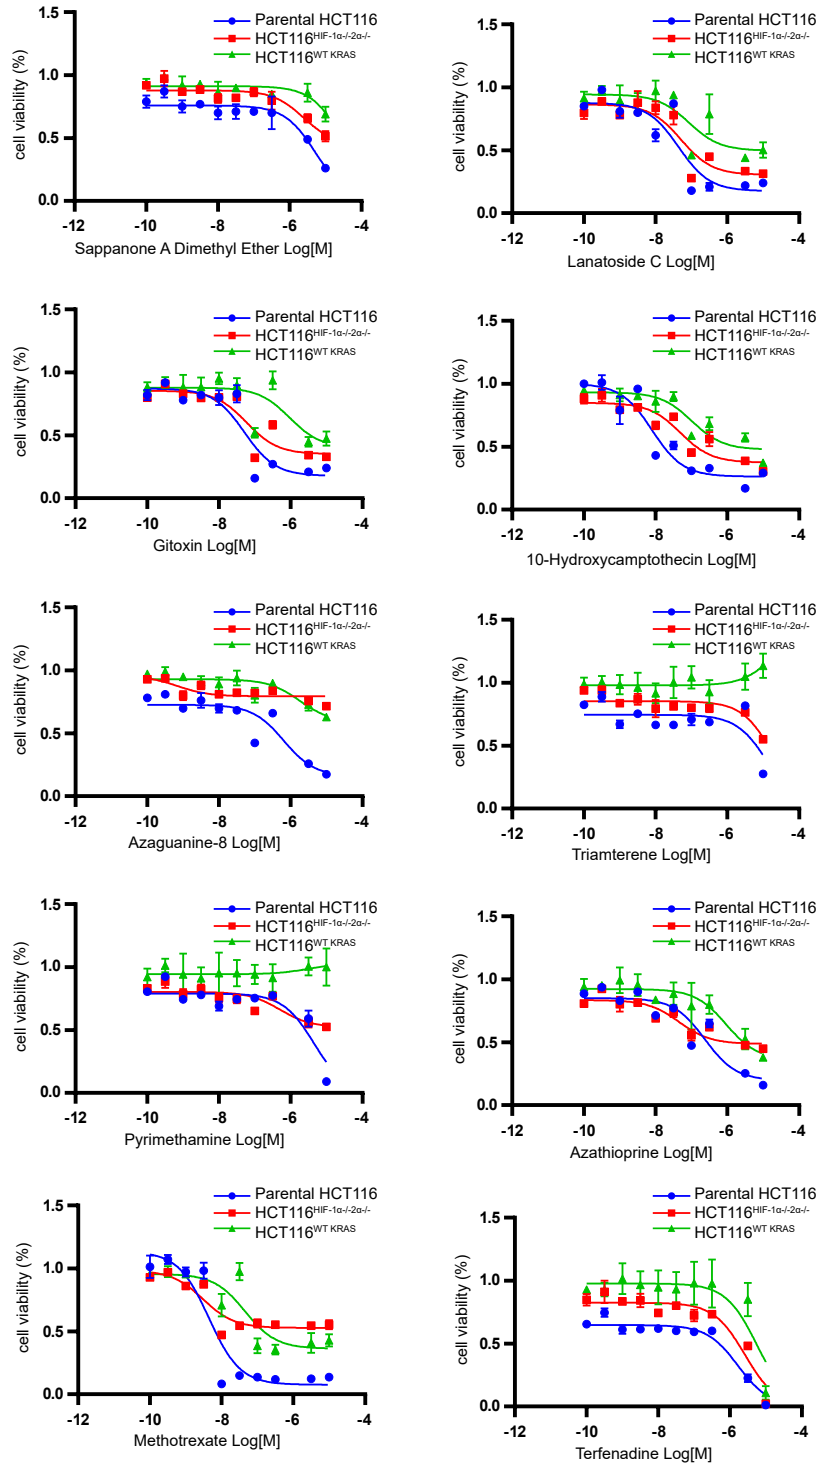

**Figure S5c.** Dose-response analysis of remaining top 55 drugs (drugs 26-35) showing differential toxicity and efficacy trends (see corresponding Supplementary Table S7).

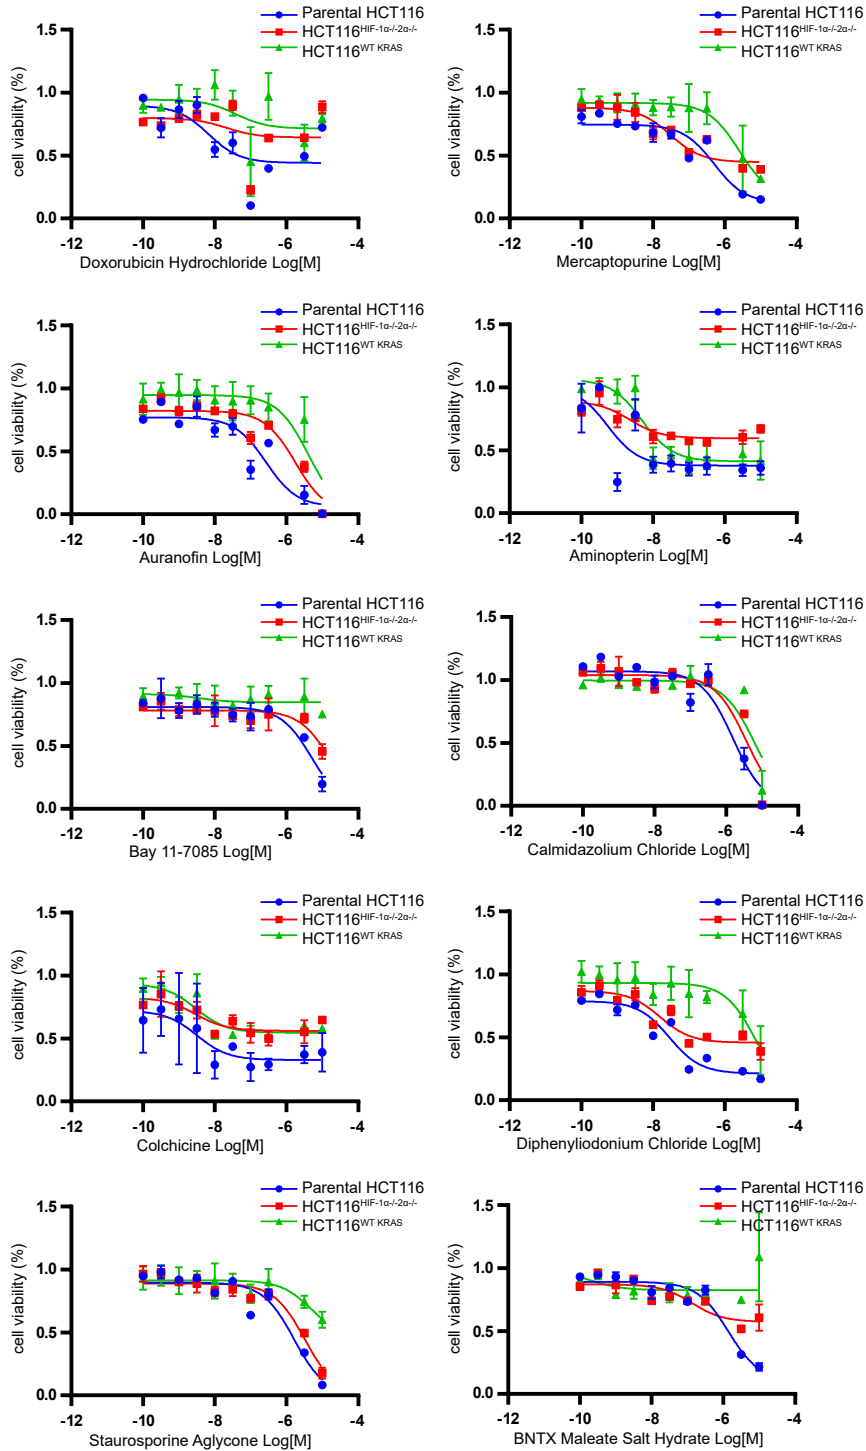

**Figure S5d.** Dose-response analysis of remaining top 55 drugs (drugs 36-45) showing differential toxicity and efficacy trends (see corresponding Supplementary Table S7).

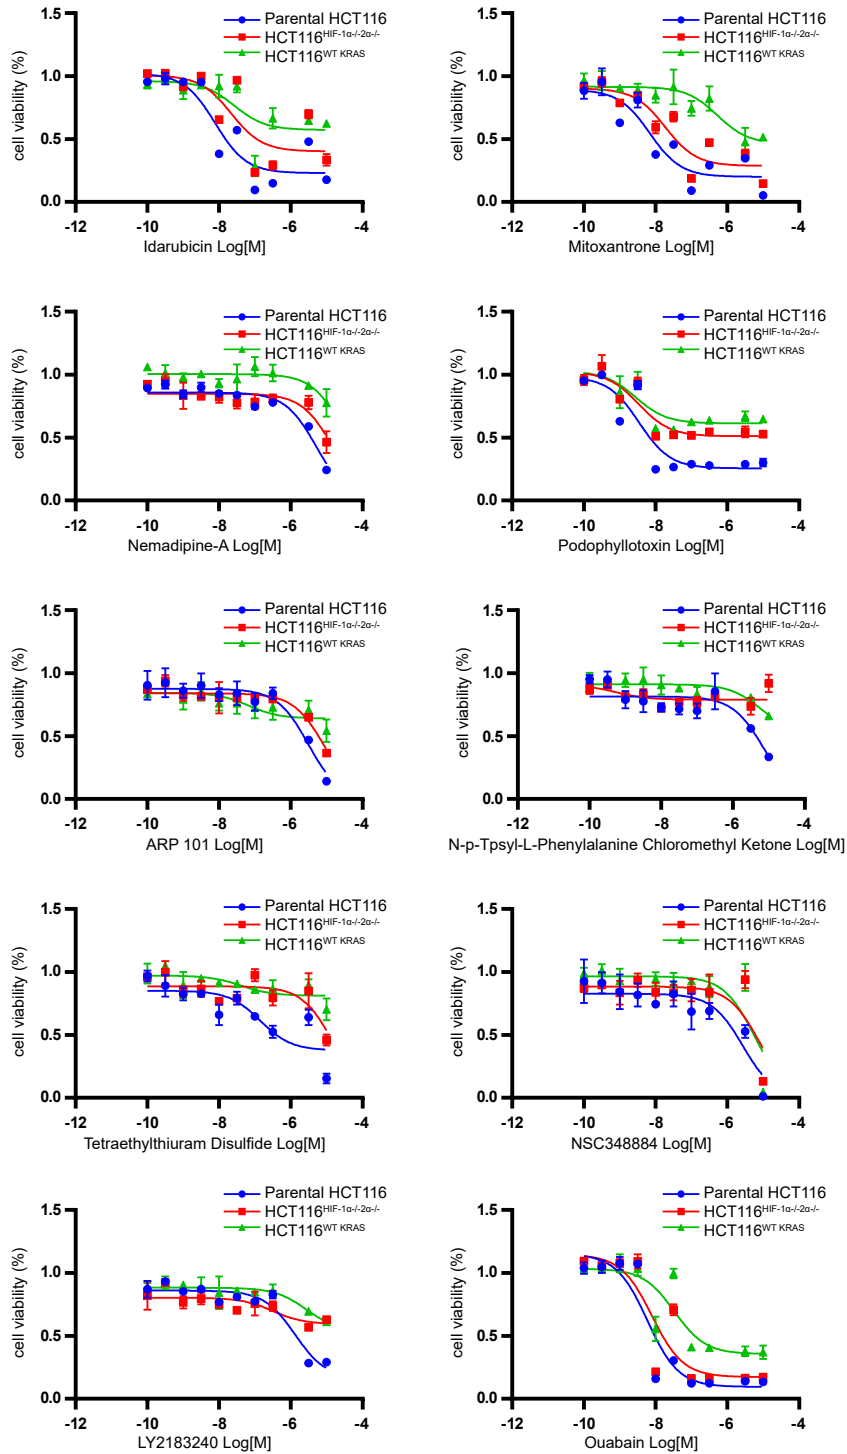

**Figure S5e.** Dose-response analysis of remaining top 55 drugs (drugs 46-55) showing differential toxicity and efficacy trends (see corresponding SupplementaryTable S7).

**Table S1a.** Gene perturbations affecting the canonical HIF pathway. Values indicate fold changes in HIF pathway genes on the logarithmic scale. Positive values indicate a gene expression higher than parental HCT116, whereas a negative value indicates a reduced expression level.

| Symbol   | Entrez Gene Name                                                                        | HCT116 <sup>HIF-1α-/-</sup> | HCT116 <sup>HIF-2α-/-</sup> | HCT116 <sup>HIF-1α-/-2α-/-</sup> | HCT116 <sup>MUT KRAS</sup> | HCT116 <sup>WT KRAS</sup> |
|----------|-----------------------------------------------------------------------------------------|-----------------------------|-----------------------------|----------------------------------|----------------------------|---------------------------|
| AKT1     | v-akt murine thymoma viral oncogene homolog 1                                           | -1.071                      | -1.439                      | 1.283                            | -1.12                      | -1.026                    |
| AKT2     | v-akt murine thymoma viral oncogene homolog 2                                           | 1.24                        | 1.73                        | -1.253                           | 1.224                      | 1.343                     |
| AKT3     | v-akt murine thymoma viral oncogene homolog 3 (protein kinase B, gamma)                 | -1.194                      | -1.178                      | -1.222                           | -1.341                     | 1.215                     |
| APEX1    | APEX nuclease (multifunctional DNA repair enzyme) 1                                     | -1.428                      | -1.126                      | 1.113                            | 1.024                      | 1.368                     |
| ARNT     | aryl hydrocarbon receptor nuclear translocator                                          | 1.922                       | -1.646                      | 1.446                            | 1.712                      | -1.489                    |
| ATM      | ataxia telangiectasia mutated                                                           | -1.303                      | -2.576                      | -1.427                           | 1.648                      | -1.393                    |
| COPS5    | COP9 constitutive photomorphogenic homolog subunit 5 (Arabidopsis)                      | -1.015                      | -1.017                      | 1.082                            | 1.092                      | 1.041                     |
| CREBBP   | CREB binding protein                                                                    | -1.238                      | 1.981                       | -1.24                            | 1.195                      | 1.365                     |
| CUL2     | cullin 2                                                                                | 1.225                       | -1.275                      | 1.789                            | 1.089                      | 1.541                     |
| EDN1     | endothelin 1                                                                            | 1.174                       | 1.289                       | 13.843                           | -1.049                     | 45.303                    |
| EGLN1    | egl nine homolog 1 (C. elegans)                                                         | -1.513                      | -1.872                      | -1.621                           | 1.724                      | 1.479                     |
| EGLN2    | egl nine homolog 2 (C. elegans)                                                         | 1.137                       | 1.991                       | 1.723                            | 1.131                      | 1.257                     |
| EGLN3    | egl nine homolog 3 (C. elegans)                                                         | -1.741                      | -2.829                      | -2.175                           | -1.161                     | -2.661                    |
| EP300    | E1A binding protein p300                                                                | -1.195                      | -3.206                      | -1.074                           | 1.134                      | 1.155                     |
| EPO      | erythropoietin                                                                          | -1.2                        | 1.749                       | 1.229                            | 1.343                      | -1.11                     |
| FIGF     | c-fos induced growth factor (vascular endothelial growth factor D)                      | 1.022                       | 1.047                       | 1.31                             | 1.048                      | 1.238                     |
| HIF1A    | hypoxia inducible factor 1, alpha subunit (basic helix-loop-helix transcription factor) | -7.972                      | -1.318                      | -2.77                            | -1.195                     | 1.322                     |
| HRAS     | v-Ha-ras Harvey rat sarcoma viral oncogene homolog                                      | 1.22                        | -1.179                      | 1.979                            | 1.009                      | 1.432                     |
| HSP90AA1 | heat shock protein 90kDa alpha (cytosolic), class A member 1                            | -1.398                      | 1.024                       | 1.119                            | -1.068                     | 1.017                     |
| JUN      | jun proto-oncogene                                                                      | 1.151                       | -1.951                      | 1.382                            | -1.419                     | 1.75                      |
| KRAS     | v-Ki-ras2 Kirsten rat sarcoma viral oncogene homolog                                    | 1.842                       | -1.714                      | -1.324                           | -1.537                     | -2.203                    |
| LDHA     | lactate dehydrogenase A                                                                 | -1.219                      | -1.085                      | -1.239                           | 1.014                      | -1.166                    |
| LDHB     | lactate dehydrogenase B                                                                 | -1.173                      | 1.082                       | 1.255                            | -1.086                     | 1.201                     |
| LDHC     | lactate dehydrogenase C                                                                 | -1.074                      | 1.184                       | -1.033                           | 1.328                      | 1.094                     |
| MAPK1    | mitogen-activated protein kinase 1                                                      | 1.454                       | -3.092                      | 1.569                            | 1.63                       | 1.543                     |
| MAPK3    | mitogen-activated protein kinase 3                                                      | 1.037                       | 1.333                       | -1.056                           | -1.041                     | -1.086                    |
| MAPK4    | mitogen-activated protein kinase 4                                                      | 1.202                       | 2.568                       | -1.099                           | -1.36                      | 1.077                     |
| MAPK6    | mitogen-activated protein kinase 6                                                      | 1.118                       | 1.022                       | -1.029                           | 1.302                      | -1.251                    |
| MAPK7    | mitogen-activated protein kinase 7                                                      | -1.072                      | 1.151                       | 1.133                            | -1.038                     | 1.12                      |
| MAPK8    | mitogen-activated protein kinase 8                                                      | -1.127                      | -1.164                      | -1.27                            | 1.377                      | -1.348                    |
| MAPK9    | mitogen-activated protein kinase 9                                                      | 1.303                       | -1.281                      | -1.358                           | 1.062                      | -1.641                    |
| MAPK10   | mitogen-activated protein kinase 10                                                     | -1.161                      | 1.382                       | -1.116                           | -1.134                     | -1.298                    |
| MAPK11   | mitogen-activated protein kinase 11                                                     | 1.609                       | 1.3                         | -1.079                           | -1.22                      | -1.24                     |
| MAPK12   | mitogen-activated protein kinase 12                                                     | 1.159                       | 2.312                       | 2.163                            | -1.253                     | 1.462                     |
| MAPK13   | mitogen-activated protein kinase 13                                                     | -1.359                      | -2.189                      | 1.057                            | -1.143                     | 1.343                     |
| MAPK14   | mitogen-activated protein kinase 14                                                     | 1.155                       | -1.804                      | 1.192                            | 1.107                      | 1.198                     |
| MAPK15   | mitogen-activated protein kinase 15                                                     | 1.137                       | 1.805                       | -1.242                           | 1.174                      | -1.2                      |
| MDM2     | Mdm2, p53 E3 ubiquitin protein ligase homolog (mouse)                                   | 2.008                       | -1.37                       | 2.115                            | 1.665                      | 3.378                     |
| MMP2     | matrix metalloproteinase 2 (gelatinase A, 72kDa gelatinase, 72kDa type IV collagenase)  | -1.084                      | 2.182                       | 1.094                            | -1.17                      | -1.1                      |
| MMP3     | matrix metalloproteinase 3 (stromelysin 1, progelatinase)                               | -1.023                      | -1.01                       | 1.1                              | 1.007                      | 1.029                     |
| MMP7     | matrix metalloproteinase 7 (matrilysin, uterine)                                        | -1.236                      | -1.304                      | -1.405                           | -1.243                     | 2.022                     |
| MMP8     | matrix metalloproteinase 8 (neutrophil collagenase)                                     | -1.003                      | 1.29                        | 1.003                            | -1.042                     | -1.01                     |
| MMP9     | matrix metalloproteinase 9 (gelatinase B, 92kDa gelatinase, 92kDa type IV collagenase)  | 1.296                       | 1.698                       | 1.482                            | 1.229                      | 1.347                     |
| MMP10    | matrix metalloproteinase 10 (stromelysin 2)                                             | -1.282                      | -1.227                      | -1.768                           | -1.336                     | -1.691                    |
| MMP11    | matrix metalloproteinase 11 (stromelysin 3)                                             | 1.259                       | 2.044                       | 1.384                            | 1.27                       | 1.065                     |
| MMP12    | matrix metalloproteinase 12 (macrophage elastase)                                       | -1.056                      | -1.178                      | -1.059                           | -1.152                     | 1.059                     |

**Table S1b.** Gene perturbations affecting the canonical HIF pathway (cont). Values indicate fold changes in HIF pathway genes on the logarithmic scale. Positive values indicate a gene expression higher than parental HCT116, whereas a negative value indicates a reduced expression level.

| Symbol  | Entrez Gene Name                                                             | HCT116 <sup>HIF-1a-/-</sup> | HCT116 <sup>HIF-2a-/-</sup> | HCT116 <sup>HIF-1a-/-2a-/-</sup> | HCT116 <sup>MUT KRAS</sup> | HCT116 <sup>WT KRAS</sup> |
|---------|------------------------------------------------------------------------------|-----------------------------|-----------------------------|----------------------------------|----------------------------|---------------------------|
| MMP15   | matrix metalloproteinase 15 (membrane-inserted)                              | 1.034                       | 1.679                       | -1.509                           | -1.502                     | -1.392                    |
| MMP16   | matrix metalloproteinase 16 (membrane-inserted)                              | 1.083                       | 1.094                       | -1.159                           | -1.164                     | -1.232                    |
| MMP20   | matrix metalloproteinase 20                                                  | -1.046                      | 1.031                       | -1.115                           | -1.139                     | 1.931                     |
| MMP24   | matrix metalloproteinase 24 (membrane-inserted)                              | 1.135                       | 1.585                       | 1.181                            | -1.182                     | 1.843                     |
| MMP25   | matrix metalloproteinase 25                                                  | -1.188                      | 1.844                       | -1.342                           | -1.319                     | -1.342                    |
| MMP26   | matrix metalloproteinase 26                                                  | -1.109                      | -1.075                      | -1.091                           | -1.278                     | -1.153                    |
| MMP27   | matrix metalloproteinase 27                                                  | -1.032                      | 1.37                        | 1.047                            | 1.043                      | 1.113                     |
| MMP28   | matrix metalloproteinase 28                                                  | 2.605                       | -1.687                      | -1.685                           | 1.335                      | -3.485                    |
| MMP1    | matrix metalloproteinase 1 (interstitial collagenase)                        | -2.566                      | -17.932                     | -22.772                          | -16.734                    | -21.566                   |
| MRAS    | muscle RAS oncogene homolog                                                  | 1.329                       | 1.821                       | 1.299                            | -1.239                     | 1.429                     |
| NAA10   | N(alpha)-acetyltransferase 10, NatA catalytic subunit                        | 1.187                       | 1.113                       | 1.362                            | 1.332                      | 1.294                     |
| NCOA1   | nuclear receptor coactivator 1                                               | 1.728                       | -1.975                      | 1.636                            | -1.331                     | 1.428                     |
| NOS1    | nitric oxide synthase 1 (neuronal)                                           | -1.168                      | -1.328                      | -1.262                           | -1.462                     | -1.294                    |
| NOS2    | nitric oxide synthase 2, inducible                                           | 1.411                       | 1.573                       | 1.493                            | 1.114                      | 1.549                     |
| NOS3    | nitric oxide synthase 3 (endothelial cell)                                   | 2.018                       | -1.717                      | 1.567                            | -1.194                     | 1.284                     |
| NRAS    | neuroblastoma RAS viral (v-ras) oncogene homolog                             | 1.386                       | -1.039                      | 1.658                            | 1.437                      | 1.442                     |
| PDGFC   | platelet derived growth factor C                                             | -2.195                      | -2.427                      | 2.647                            | -1.152                     | 1.825                     |
| PGF     | placental growth factor                                                      | 2.169                       | 1.5                         | 2.404                            | 1.368                      | 1.5                       |
| PIK3C3  | phosphoinositide-3-kinase, class 3                                           | -1.243                      | -3.05                       | 1.389                            | -1.438                     | -1.459                    |
| PIK3C2A | phosphoinositide-3-kinase, class 2, alpha polypeptide                        | 2.156                       | -2.455                      | -4.284                           | 1.955                      | -2.578                    |
| PIK3C2B | phosphoinositide-3-kinase, class 2, beta polypeptide                         | -1.053                      | -1.181                      | 1.084                            | -1.213                     | 1.263                     |
| PIK3C2G | phosphoinositide-3-kinase, class 2, gamma polypeptide                        | 1.012                       | 1.201                       | 1.055                            | 1.043                      | -1.035                    |
| PIK3CA  | phosphoinositide-3-kinase, catalytic, alpha polypeptide                      | -1.357                      | -2.636                      | -2.041                           | -1.327                     | -2.56                     |
| PIK3CB  | phosphoinositide-3-kinase, catalytic, beta polypeptide                       | 1.734                       | -1.528                      | -1.374                           | 1.449                      | -1.571                    |
| PIK3CD  | phosphoinositide-3-kinase, catalytic, delta polypeptide                      | -1.176                      | -1.395                      | 1.357                            | -1.251                     | -1.142                    |
| PIK3CG  | phosphoinositide-3-kinase, catalytic, gamma polypeptide                      | 1.183                       | 1.286                       | -1.111                           | -1.131                     | 1.111                     |
| PIK3R1  | phosphoinositide-3-kinase, regulatory subunit 1 (alpha)                      | -1.871                      | -3.598                      | -1.713                           | -1.674                     | -1.144                    |
| PIK3R2  | phosphoinositide-3-kinase, regulatory subunit 2 (beta)                       | -1.103                      | -1.236                      | 1.22                             | -1.23                      | 1.301                     |
| PIK3R3  | phosphoinositide-3-kinase, regulatory subunit 3 (gamma)                      | -1.398                      | -2.242                      | -1.566                           | -1.578                     | 2.227                     |
| PIK3R4  | phosphoinositide-3-kinase, regulatory subunit 4                              | 1.056                       | -1.227                      | 1.255                            | 1.269                      | 1.135                     |
| PIK3R5  | phosphoinositide-3-kinase, regulatory subunit 5                              | 1.119                       | 1.458                       | 1.696                            | -1.091                     | -1.085                    |
| PIK3R6  | phosphoinositide-3-kinase, regulatory subunit 6                              | 1.147                       | 1.811                       | -1.123                           | -1.015                     | -1.059                    |
| PROK1   | prokineticin 1                                                               | -1.08                       | 1.472                       | -1.144                           | -1.053                     | -1.005                    |
| RBX1    | ring-box 1, E3 ubiquitin protein ligase                                      | -1.102                      | 1.175                       | 1.373                            | 1.336                      | 1.347                     |
| RRAS2   | related RAS viral (r-ras) oncogene homolog 2                                 | 1.131                       | -1.14                       | -1.273                           | 1.153                      | 1.157                     |
| RRAS    | related RAS viral (r-ras) oncogene homolog                                   | 1.461                       | -1.107                      | -1.713                           | 1.198                      | -3.105                    |
| SLC2A1  | solute carrier family 2 (facilitated glucose transporter), member 1          | 1.256                       | 2.113                       | 2.46                             | -1.862                     | -3.282                    |
| SLC2A2  | solute carrier family 2 (facilitated glucose transporter), member 2          | -1.031                      | -1.11                       | -1.147                           | -1.115                     | -1.085                    |
| SLC2A3  | solute carrier family 2 (facilitated glucose transporter), member 3          | 8.374                       | -1.881                      | 6.937                            | -2.102                     | 5.154                     |
| SLC2A4  | solute carrier family 2 (facilitated glucose transporter), member 4          | 1.132                       | 1.154                       | -1.028                           | -1.205                     | -1.235                    |
| SLC2A5  | solute carrier family 2 (facilitated glucose/fructose transporter), member 5 | -1.337                      | 1.293                       | -1.322                           | -1.193                     | -1.239                    |
| TCEB1   | transcription elongation factor B (SIII), polypeptide 1 (15kDa, elongin C)   | -1.07                       | 1.075                       | 1.434                            | 1.151                      | 1.078                     |
| TCEB2   | transcription elongation factor B (SIII), polypeptide 2 (18kDa, elongin B)   | 1.271                       | 1.338                       | 1.443                            | 1.281                      | 1.184                     |
| TP53    | tumor protein p53                                                            | -1.238                      | -1.647                      | 1.61                             | -1.723                     | 1.32                      |
| VEGFA   | vascular endothelial growth factor A                                         | -1.88                       | -2.423                      | -4.836                           | -2.135                     | -3.747                    |
| VEGFB   | vascular endothelial growth factor B                                         | -1.186                      | 1.004                       | -1.035                           | -1.061                     | 1.029                     |
| VEGFC   | vascular endothelial growth factor C                                         | -1.021                      | 1.476                       | 1.088                            | -1.013                     | 1.142                     |
| VHL     | von Hippel-Lindau tumor suppressor, E3 ubiquitin protein ligase              | -1.333                      | -1.71                       | -1.133                           | 1.422                      | 1.262                     |



**Table S2.** Gene list for siRNAs which demonstrate differential cytotoxicity towards HCT116<sup>HIF-1 $\alpha$ -/-2 $\alpha$ -/-</sup>, HCT116<sup>WT KRAS</sup>, or both.

|                      |                                                                                                                                                                                                                                                                                                                                                                                                                                                                                                                                                                                                                                                                                                                                                                                                                                                                                                                                                                                                                                                                                                                                                                                                                                                                                                                                                                                                                                                                                                                                                                                                                                                                                                                                                                                                                                                                                                                                                                                                                                                                                                                                                                                                                                                                                                                   |
|----------------------|-------------------------------------------------------------------------------------------------------------------------------------------------------------------------------------------------------------------------------------------------------------------------------------------------------------------------------------------------------------------------------------------------------------------------------------------------------------------------------------------------------------------------------------------------------------------------------------------------------------------------------------------------------------------------------------------------------------------------------------------------------------------------------------------------------------------------------------------------------------------------------------------------------------------------------------------------------------------------------------------------------------------------------------------------------------------------------------------------------------------------------------------------------------------------------------------------------------------------------------------------------------------------------------------------------------------------------------------------------------------------------------------------------------------------------------------------------------------------------------------------------------------------------------------------------------------------------------------------------------------------------------------------------------------------------------------------------------------------------------------------------------------------------------------------------------------------------------------------------------------------------------------------------------------------------------------------------------------------------------------------------------------------------------------------------------------------------------------------------------------------------------------------------------------------------------------------------------------------------------------------------------------------------------------------------------------|
| <b>HIF Specific</b>  | ADAMTS2 ADAMTS20 AKT2 ALDOB ALG1 APC APOA2 AQP6 ARFRP1 ATP5J AURKB BACH BAX BMP7 BRS3 BZRP CD163 CFL1 CNGB1 COG4 COX7A2L CRB2 CSNK1A1 CSNK1D CSTF2 CTSK DDX5 DHX38 DKC1 DNCI2 DYRK3 E2F3 EDAR EIF2B1 EN1 FDXR FLT3 FOXN1 FOXN4 FUK FZD8 GABRR1 GTF2F1 HAND2 HAPIP HCK HIC1 INCENP ITGB7 ITGB8 KCNA10 KCNJ5 KCNK5 KIAA1613 KLRD1 KLRF1 KRTAP5-3 KRTHB1 LDHAL6B LGR8 LOC340351 LRP8 MAST4 METAP2 MRCL3 NKX6-2 NPAS1 NUP153 OAS1 OTX1 PLA2G1B PPM1D PPP2R1A PRKCDBP PRSSL1 PTHR2 RAC2 RAD23A RAD51 RALGPS2 RBM22 RGS7 RNASE1 RNF152 RNF7 SLC25A5 SPG4 SPRR2A TCFL4 TFPI TIMP2 TPH1 TPX2 TRAF1 TRIM36 TRPC4 TXNDC8 UBE2I UGT1A4 ZAN ZNRD1                                                                                                                                                                                                                                                                                                                                                                                                                                                                                                                                                                                                                                                                                                                                                                                                                                                                                                                                                                                                                                                                                                                                                                                                                                                                                                                                                                                                                                                                                                                                                                                                                                                                             |
| <b>KRAS Specific</b> | A4GALT ABCD1 ABCE1 ACAS2L ADAM12 ADAM22 ADCY6 ADORA3 ADSL AGPAT1 AKIP AKR1B10 ALDH8A1 ALDOC ALK ALOXE3 ALX4 ANAPC2 ANGPT1 ANGPT2 ANGPT4 ANGPTL4 APC2 APG4A APM-1 APOL3 ARHGDI3 ARID3B ASL ATE1 ATP6V1B2 ATP6V1G1 B3GNT7 BCL11A BIRC4 BTN2A1 BTN3A2 C5R1 CA6 CAD CARM1 CBLC CCNB2 CCR2 CD1D CD28 CDADC1 CHC1 CHD1 CHRNA5 CHST9 CLN2 CLTA CNGA3 CNOT4 CNOT6L COQ3 COX6B2 CPA1 CPA5 CPD CPNE3 CPSF2 CRSP2 CTSG CYP21A2 DBX1 DDX54 Dlc2 DLGAP1 DNAH8 DNAH9 DNCL2A DPEP2 DPP3 DUXA DZIP1 ECE2 EFO1 EGLN2 EIF5B EPOR ERAL1 ESAM ESR2 EVI5L EXOSC5 EXOSC7 EXOSC8 EZH1 FBL FDFT1 FLJ10326 FLJ12760 FLJ20257 FLJ20277 FLJ22955 FLJ23598 FLJ31121 FLJ31579 FLJ37300 FN3K FN3KRP FOLR3 FOXC1 FSD1 FTSJ3 FUT2 FXYD5 GALNT12 GAPD GDF8 GEM GLA GLO1 GLP1R GLS GMPPB GNAI3 GNAQ GNG13 GNG2 GNG4 GPAM GPR111 GPR147 GPR172A GPR19 GPR40 GPR52 GPR61 GPR75 GPRC5B GPT GRCA GRIA2 GRM1 GRM2 GSTA2 GSTM4 GSTP1 HAL HEMK1 HESX1 HNRPC HSD11B2 HSD3B7 HSF1 HYPB IL10RA IL2RA IL8RA IMP-3 INHA INHBA ITGA3 ITGAV JUP K5B KA35 KCNK17 KCTD5 KIAA0073 KIF23 KIF25 KIFC2 KIRREL3 KLK1 KLK10 KLRC1 KLRC2 KLRG1 KRTAP5-6 KRTHA7 LARS LOC113655 LOC375328 LOC387700 LOC90701 LSM4 LSM8 M160 MAGI-3 MAP3K1 MAP3K4 MAPKAP1 MARS MAST2 MAWBP MAX MCL1 MGAT1 MGC15668 MGC24132 MIR MMP12 MPP6 MYH1 NDOR1 NDUFA3 NDUFB10 NGFB NKIRAS2 NOL1 NOVA2 NR3C1 NRBP NS3TP1 NT5C1B NTS NUP155 NXF1 ORC4L P11 PABPN1 PAD12 PAK2 PAQR3 PAQR6 PARVB PCSK7 PCTK1 PDCD11 PDLIM3 PEX6 PFAS PGLYRP2 PHOSPHO1 PKD1L2 PKD1L3 PLAA PLCZ1 PMPCB POLK POLR2A POLR2C POLR2H POLR2L POLR3F PPP1R10 PPP1R14C PPP2CB PPP4R2 PRCP PRES PRKACG PRKCN PRKD2 PRLR PROZ PRSS35 PSAP PSFL PSMB1 PSMC2 PSMC4 PSMD14 PSMD7 PSPC1 PTBP1 PTDSR PTGIR PURA PYC1 RAB25 RAB3IP RAB5C RAD54L RAP1A RARB RASSF2 RE1T1 RHOBTB2 RNF26 RORC RPA2 RPN2 RRH RRP22 RTN4RL1 RUVBL1 SCO2 SDHA SEMA3B SEMA3D SEMA4C SET8 SETDB1 SF1 SFPQ SIAT4B SIAT8B SIVA SLC10A2 SLC12A5 SLC15A2 SLC16A13 SLC26A9 SLC2A12 SLC7A4 SLIT1 SLU7 SMAD4 SMARCA4 SMARCD3 SMPD1 SMPDL3B SNRP70 SNRPA1 SNRPD2 SPG7 SR140 SRRM1 STARD5 STK10 SUCLA2 SYMPK SYNPO2L SYPL TAF1L TALDO1 TAZ TBDN100 TBX22 TBX5 TCF15 TDE2 TEKT3 Tenr TFIP11 TGM3 TGM6 THOC4 TIF1 TIMM13 TIMP3 TLR2 TMX2 TNP2 TOMM22 TOPORS TRRAP TYMS UBE2D2 UBE2G1 UBL5 USP16 USP40 USP5 USP9Y VHL VIPR1 VNN2 VTN WFIKKN2 WFS1 XAB1 XYLT1 XYLT2 ZMAT1 ZNF219 |
| <b>Both</b>          | ACTL6A ADAM33 ADAMTS5 ALDOA APOF ARPM2 ASAH2 ASB2 ASCC3L1 ATP8A1 BIRC3 BST1 BUB1B C6orf11 CALCB CCNA2 CD244 CDC2 CDC2L2 CDC45L CENPE CHERP chTOG COPB CRLF1 DARS DDX23 DDX48 DHX8 DNCH1 ESPL1 EXOSC3 FGD5 FOXP3 GART GNG5 GPR100 GPR158 GTF3C2 GTPBP1 GTPBP4 HAS3 HIF3A HUMAUANTIG ITGAL K-ALPHA-1 KCNH7 KCNK3 KIAA0052 KIF11 KIFC3 KPNB1 LSM6 LSM7 MAP2 MMP25 MTHFD1 MYBBP1A NCL NUP107 NUP214 NUP62 NUP98 PLK1 PNR POLA POLD1 POLN POLR1A POLR1B POLR1D POLR2B POLR2E POLR2F POLR2G POLR2I POLR2J POLR2K PPIE PPP1R15B PRIM1 PRP19 PRPF8 PSMA1 PSMA2 PSMA3 PSMA4 PSMA5 PSMA6 PSMA7 PSMB2 PSMB3 PSMB4 PSMB5 PSMB6 PSMB7 PSMC3 PSMC5 PSMC6 PSMD2 QPCT RAB33A RAB7B RAN RBM19 RBM8A RNPC2 RNPEPL1 RNPS1 RPA1 RPN1 RRM1 RUVBL2 SARS SERPINB6 SF3A1 SF3B3 SF3B4 SFRS3 SFRS7 SLC22A14 SMC2L1 SMC4L1 SNAI2 SNRPB SNRPD1 SNRPE SNRPF SNRPG SP2 SPRR2B SUPT5H SUPT6H TERF1 THAP7 THRAP6 TIMM23 TIMM44 TRIM46 TSG101 TXNL4A U2AF2 UBE1 UMPS UROD USP18 USP36 USP39 VCP VSX1 WRN XAB2 XPO1                                                                                                                                                                                                                                                                                                                                                                                                                                                                                                                                                                                                                                                                                                                                                                                                                                                                                                                                                                                                                                                                                                                                                                                                                                                                                                                                 |

**Table S3a.** Top 10 canonical pathways associated with HIF

| Ingenuity Canonical Pathways            | Molecules                                                                                                              |
|-----------------------------------------|------------------------------------------------------------------------------------------------------------------------|
| Protein Ubiquitination Pathway          | UBA1,PSMA4,PSMC3,PSMA6,PSMA3,USP18,PSMB5,USP36,USP39,PSMA7,PSMB4,PSMB7,UBE2I,PSMC5,PSMA2,PSMB2,PSMB3,PSMC6,PSMA1,PSMA5 |
| Nucleotide Excision Repair Pathway      | POLR2B,POLR2E,POLR2J,POLR2F,RPA1,POLR2I,POLR2G                                                                         |
| Systemic Lupus Erythematosus Signaling  | SNRPG,LSM6,RNU2-1,SNRPE,SNRPD1,PRPF19,SNRNP200,SNRPF,TXNL4A,MAPK1,IGHM,SNRPB,IFNA4                                     |
| Assembly of RNA Polymerase II Complex   | POLR2B,GTF2F1,POLR2E,POLR2J,POLR2F,POLR2I,POLR2G                                                                       |
| Estrogen Receptor Signaling             | POLR2B,MED30,GTF2F1,POLR2E,POLR2J,POLR2F,MAPK1,DDX5,POLR2I,POLR2G                                                      |
| Hereditary Breast Cancer Signaling      | POLR2B,POLR2E,POLR2J,POLR2F,RPA1,POLR2I,RAD51,POLR2G,CDK1                                                              |
| Androgen Signaling                      | POLR2B,GTF2F1,POLR2E,POLR2J,POLR2F,MAPK1,POLR2I,POLR2G                                                                 |
| Glucocorticoid Receptor Signaling       | POLR2B,TSG101,GTF2F1,UBE2I,POLR2E,POLR2J,POLR2F,MAPK1,CD163,POLR2I,POLR2G                                              |
| Regulation of eIF4 and p70S6K Signaling | GTP,EIF2S1,RPS26,RPS7,PPP2R1A,MAPK1,EIF4A2,EIF4A3                                                                      |
| Huntington's Disease Signaling          | POLR2B,DYNC112,PENK,POLR2E,POLR2J,POLR2F,MAPK1,ATP5J,POLR2I,POLR2G                                                     |

**Table S3b.** Top 10 canonical pathways associated with KRAS

| Ingenuity Canonical Pathways                            | Molecules                                                                                                                                                                   |
|---------------------------------------------------------|-----------------------------------------------------------------------------------------------------------------------------------------------------------------------------|
| Protein Ubiquitination Pathway                          | UBA1,PSMD7,PSMA3,USP18,PSMB5,USP5,PSMC4,USP36,PSMA7,PSMB7,PSMA2,PSMD14,PSMB2,PSMB3,PSMA1,PSMA5,USP16,PSMA4,PSMC3,PSMA6,UBE2G1,USP40,PSMC2,VHL,USP39,USP9Y,PSMB4,PSMC5,PSMC6 |
| CREB Signaling in Neurons                               | GTF2B,CREB1,ADCY6,PRKD3,POLR2E,POLR2F,POLR2C,GNAI3,POLR2B,POLR2H,GNAQ,POLR2L,GNG4,GRIA2,POLR2J,GRM1,GNG2,GNG13,PLCZ1,PRKCH,POLR2I,POLR2G                                    |
| Nucleotide Excision Repair Pathway                      | POLR2B,POLR2H,POLR2L,RPA2,POLR2E,POLR2J,POLR2F,RPA1,POLR2C,POLR2I,POLR2G                                                                                                    |
| Androgen Signaling                                      | GTF2B,PRKD3,POLR2E,POLR2F,POLR2C,GNAI3,POLR2B,POLR2H,GNAQ,POLR2L,GNG4,POLR2J,GNG2,GNG13,PRKCH,POLR2I,POLR2G                                                                 |
| Huntington's Disease Signaling                          | CREB1,PENK,PRKD3,POLR2E,SDHA,POLR2F,POLR2C,POLR2B,POLR2H,GNAQ,POLR2L,CLTA,GNG4,POLR2J,GRM1,GNG2,GNG13,PRKCH,POLR2I,NGF,POLR2G,GLS                                           |
| Assembly of RNA Polymerase II Complex                   | GTF2B,POLR2B,POLR2H,POLR2L,POLR2E,POLR2J,TAF1L,POLR2F,POLR2C,POLR2I,POLR2G                                                                                                  |
| Estrogen Receptor Signaling                             | GTF2B,POLR2E,POLR2F,POLR2C,POLR2B,POLR2H,POLR2L,MED30,NR3C1,MED14,POLR2J,TAF1L,POLR2I,POLR2G,CARM1,TRRAP                                                                    |
| Systemic Lupus Erythematosus Signaling                  | SNRPG,LSM6,SNRPE,LSM8,SNRPD1,HNRNPC,LSM4,PRPF19,SNRP70,SNRPD2,SNRNP200,CLK1,SNRPF,SNRPA1,TXNL4A,IGHM,SNRPB                                                                  |
| Glucocorticoid Receptor Signaling                       | GTF2B,TSG101,CREB1,POLR2E,POLR2F,VIPR1,POLR2C,SMAD4,POLR2B,POLR2H,POLR2L,NR3C1,MED14,MAP3K1,POLR2J,TAF1L,POLR2I,POLR2G                                                      |
| GPCR-Mediated Nutrient Sensing in Enteroendocrine Cells | GNAQ,ADCY6,PRKD3,GNG4,PLCZ1,GNG2,GNG13,PRKCH,FFAR1,GNAI3                                                                                                                    |

**Table S4.** IPA network analysis of siRNAs on differential toxicity

| ID | Analysis                 | Molecules in Network                                                                                                                                                                                                                                                                                                                                       | Score | Focus Molecules | Top Diseases and Functions                                                                    |
|----|--------------------------|------------------------------------------------------------------------------------------------------------------------------------------------------------------------------------------------------------------------------------------------------------------------------------------------------------------------------------------------------------|-------|-----------------|-----------------------------------------------------------------------------------------------|
| 1  | HIF-associated toxicity  | 3-hydroxyanthranilic acid,CSTF2,DBT,DHX38, DUB,EDAR, EIF4A2,EIF4A3, GNL2, GTPBP4, IFNA4,Igh (family),LSM6,NFKB (complex), PPIE,PRPF19, RBM39, RBM8A,RNPS1,RNU2-1,RPLP1,SF3A1 SF3B3,snRNP, SNRNP200,S NRPB,SNRPD1, SNRPE,SNRPF, SNRPG, TXNL4A, USP18,USP36,USP39,XAB2                                                                                       | 63    | 31              | RNA Post-Transcriptional Modification, Cellular Assembly and Organization, Infectious Disease |
| 1  | KRAS-associated toxicity | Akt,ALYREF,CHERP,DHX8,EIF4A3,FABP3,FOXC1,GEM,Impo rtin beta, KCTD5,KPNB1,MAPKAP1, Nucleoporin,NUP62, NUP155,NUP214, NXF1,PAQR3,PSAP, RBM39,RBM8A,RNPS1, SEMA3B,SF1,SF3A1,SF3B3,SMARCD3,SRSF3,Tap, TCF15, TFIP11,U2AF2,U2SURP,UPF1,XPO1                                                                                                                     | 53    | 31              | Molecular Transport, RNA Trafficking, RNA Post-Transcriptional Modification                   |
| 2  | KRAS-associated toxicity | 3-hydroxyanthranilic acid,DUB,FBL, FTSJ3,GLA,GNL2,G TPBP4,IFITM3, Ifnar,LSM4, LSM6,LSM8,MAST2,NFKB(complex), NKIRAS2, PDCD11, SLC15A2,snRNP, SNRNP200, SNRPA1, SNRPD1 SNRPD2, SNRPE, SNRPF, SNRPG,STK10, TALDO1, TXNL4A, USP5, USP16,USP18, USP36, USP39,USP40, USP9Y                                                                                      | 53    | 31              | RNA Post-Transcriptional Modification, Cellular Assembly and Organization, Cell Cycle         |
| 2  | HIF-associated toxicity  | 19S proteasome,20s proteasome,26s Proteasome,alcohol group acceptor phosphotransferase,ATPase,Calcineurin protein(s), CK1,COG4,CSNK1A1, CSNK1D,CTSK, CYB561, EIF2S1, Hsp70,KALRN,MAPK1, METAP2,PDE6G, PLK1,POLR2G,PP1 protein complex group, PPP1R15B,PSMA1, PSMA2,PSMA6, PSMA7, PSMB5,PSMC3,PSMC5, PSMC6,SOD1, SPAST, taurodeoxycholic acid,Ubiquitin,VCP | 46    | 24              | Cell Death and Survival, Developmental Disorder, Hereditary Disorder                          |
| 3  | KRAS-associated toxicity | CDC45,CRLF1,DNA-directed DNA polymerase, EGLN2, EXOSC3, EXOSC7, EXOSC8, GTF3C2, HBE1,KIF11,Ku, MTHFD1, MYBBP1A, NOP2, ORC4, PABPN1,POLA1,POLD1, POLN, PRIM1, PRPF19, PSMA3,PTBP1,RCC1,RPA, RPA1,RPA2, RPS7,SKIV2L2, SMC2, SMC4,SNRPB, SYMPK, Vegf,WRN                                                                                                      | 50    | 31              | RNA Post-Transcriptional Modification, Cell Cycle, Cellular Assembly and Organization         |
| 3  | HIF-associated toxicity  | Akt,CDC45,CHERP,Ctbp,DNA-directed DNA polymerase,DNA-directed RNA polymerase, DPEP1, E2f,E2F3,FLT3,FOXN1, HIC1, HIF3A, LRP8, MTHFD1,P-TEFb,POLA1,POLD1, POLN, POLR1A,POLR1B,POLR2E,POLR2F,POLR2I,POLR2J,PRIM1, Ptk,QPCT,RAD51,RNA polymerase I,Rnr,RPA,RPA1,TCF,WRN                                                                                        | 44    | 24              | Gene Expression, DNA Replication, Recombination, and Repair, Cancer                           |
| 4  | HIF-associated toxicity  | Alpha tubulin,DDX5,DYNC1H1,DYNC1I2,ERK, EXOSC3, GABRR1, Immunoproteasome Pa28/20s,MED30,mediator,MYBBP1A ,NDUFA10, POLR2B, Proteasome PA700/20s,PSMA,PSMA3, PSMA4,PSMA5,PSMB,PSMB2,PSMB3, PSMB4, PSMB7, PSMC,Ribosomal 40s subunit, RPS7, RPS26, SKIV2L2,SMC2, SMC4, SRSF3, TRAP/Media,TUBA1B,tubulin (family),UBQLN1                                      | 43    | 24              | Cell Cycle, Cellular Assembly and Organization, Cellular Function and Maintenance             |
| 4  | KRAS-associated toxicity | APOL3,CCNB2,Cdc2,Cytoplasmic Dynein,DDX54, DLGAP1,DYNC1H1,DYNLL2, DYNLRB1,GLO1, GLUD1, IARS2,MED14,MED30, mediator, Mitochondrial complex 1,NADH dehydrogenase, NDUFA5,NDUFA10,NDUFB10, NDUFS4,NR3C1, Pka,Pka catalytic subunit,PSMD7, RASSF2, REN, RUVBL2, SERPINB6, SLC10A2 ,taurodeoxycholic acid,TRAP/Media,TRRAP,trypsin,YWHAQ                        | 41    | 26              | Hereditary Disorder, Metabolic Disease, Neurological Disease                                  |
| 5  | KRAS-associated toxicity | Actin,ATP6V1G1,CD3,Ck2,CLTA,CTSG,Erm,estrogen receptor, ETS1 GAPDH,GRIA2,Histone h3, HNRNPC,HSF1,MAX, MMP25,NCL,p70 S6k ,PAM,PKD1L3,PPIE,PSMC5,RNA polymerase II,RPL11,Secretase gamma,SETD2, SNRNP70, TNPO3,TRIM24,TUBA1B,UBQLN1,VCP,VHL,XAB2,ZMAT2                                                                                                       | 41    | 26              | Cellular Compromise, Cell Death and Survival, Gene Expression                                 |

**Table S5.** IPA generated top diseases and biofunctions of siRNAs with differential cytotoxicity (score:  $-\log(p\text{-value})$ ).

| Diseases and Bio Functions                         | HIF-associated toxicity | KRAS-associated toxicity |
|----------------------------------------------------|-------------------------|--------------------------|
| cell viability of myeloma cell lines               | 13.971                  | 11.904                   |
| processing of RNA                                  | 13.446                  | 11.112                   |
| Viral Infection                                    | 9.172                   | 10.955                   |
| splicing of RNA                                    | 11.619                  | 7.906                    |
| infection by HIV-1                                 | 8.419                   | 9.232                    |
| infection of epithelial cell lines                 | 8.136                   | 9.268                    |
| infection of embryonic cell lines                  | 8.136                   | 9.268                    |
| infection of cells                                 | 8.368                   | 8.839                    |
| infection by RNA virus                             | 7.527                   | 9.401                    |
| infection of kidney cell lines                     | 7.870                   | 8.891                    |
| cell viability of tumor cell lines                 | 9.028                   | 7.503                    |
| cell survival                                      | 10.370                  | 6.012                    |
| proliferation of cells                             | 8.291                   | 7.936                    |
| replication of RNA virus                           | 8.292                   | 7.107                    |
| metabolism of protein                              | 4.757                   | 10.488                   |
| replication of virus                               | 7.847                   | 6.744                    |
| replication of Influenza A virus                   | 6.901                   | 7.332                    |
| catabolism of ATP                                  | 8.195                   | 6.022                    |
| cell viability                                     | 8.698                   | 5.519                    |
| transcription                                      | 6.234                   | 7.748                    |
| catabolism of protein                              | 2.890                   | 11.078                   |
| transcription of RNA                               | 6.093                   | 7.801                    |
| processing of mRNA                                 | 7.811                   | 5.627                    |
| expression of RNA                                  | 5.629                   | 7.802                    |
| splicing of mRNA                                   | 7.734                   | 5.635                    |
| metabolism of nucleotide                           | 7.333                   | 5.299                    |
| metabolism of nucleoside triphosphate              | 7.991                   | 4.334                    |
| metabolism of nucleic acid component or derivative | 7.254                   | 4.766                    |
| transcription of DNA                               | 5.403                   | 5.452                    |
| expression of DNA                                  | 5.0058                  | 5.5130                   |

**Table S6.** Hits from the siRNA library screen for HIF and KRAS overlap with synthetic lethals used for targeting KRAS

|                                       | synthetic lethals                 | siRNA Screen                                                                                                                                                                                                                                                    |
|---------------------------------------|-----------------------------------|-----------------------------------------------------------------------------------------------------------------------------------------------------------------------------------------------------------------------------------------------------------------|
| Protein Ubiquitination Pathway        | PSMA1, PSMA2, PSMB6, PSMD14       | ANAPC2, BIRC3, PSMA1, PSMA2, PSMA3, PSMA4, PSMA5, PSMA6, PSMA7, PSMB1, PSMB2, PSMB3, PSMB4, PSMB5, PSMB6, PSMB7, PSMC2, PSMC4, PSMC4, PSMC5, PSM6, PSMD2, PSMD7, PSMD14, UBA1, UBE2D2, UBE2G1, UBE2I, USP5, USP16, USP18, USP36, USP39, SUP40, USP9Y, VHL, XIAP |
| Nucleotide Excision Repair            | POLR2B, POLR2G                    | POLR2A, POLR2B, POLR2C, POLR2E, POLR2F, POLR2G, POLR2H, POLR2I, POLR2J, POLR2K, POLR2L, RPA1, RPA2                                                                                                                                                              |
| Estrogen Receptor Signaling           | ESR1, POLR2B, POLR2G, RUNX2       | CARM1, DDX5, ESR2, GTF2F1, MED14, MED30, NR3C1, POLR2A, POLR2B, POLR2C, POLR2E, POLR2F, POLR2G, POLR2H, POLR2I, POLR2J, POLR2K, POLR2L, SMARCA4, TAF1L, TRRAP                                                                                                   |
| Glucocorticoid Receptor Signaling     | CREBZF, ESR1, FOS, POLR2B, POLR2G | CD163, GTF2F1, MED14, MAP3K1, NRC1, POLR2A, POLR2B, POLR2C, POLR2E, POLR2F, POLR2G, POLR2H, POLR2I, POLR2J, POLR2K, POLR2L, PRKACG, SMAD4, SMARCA4, SMARCD3, TAF1L, TSG101, UBE21, AKT2, VIPR1                                                                  |
| Hereditary Breast Cancer Signaling    | E2F1, POLR2B, POLR2G              | AKT2, CDK1, POLR2A, POLR2B, POLR2C, POLR2E, POLR2F, POLR2G, POLR2H, POLR2I, POLR2J, POLR2K, POLR2L, RAD51, RPA1, SMARCA4, SMARCD3                                                                                                                               |
| Assembly of RNA Polymerase II Complex | POLR2B, POLR2G                    | GTF2F1, POLR2A, POLR2B, POLR2C, POLR2E, POLR2F, POLR2G, POLR2H, POLR2I, POLR2J, POLR2K, POLR2L, TAF1L                                                                                                                                                           |

**Table S7.** Dose-response analysis of top 55 compounds

| #  | Compound                                      | IC50 (µM) |                    |         | Efficacy (relative to parental) |         |
|----|-----------------------------------------------|-----------|--------------------|---------|---------------------------------|---------|
|    |                                               | Parental  | HIF-1a-/-HIF-2a-/- | WT KRAS | HIF-1a-/-HIF-2a-/-              | WT KRAS |
| 1  | Deoxysappanone B 7,3'-dimethyl ether acetate  | 1.4E-01   | 1.1E-02            | 2.8E-01 | 44%                             | 49%     |
| 2  | Parbendazole                                  | 2.2E-02   | 3.4E-02            | 3.1E-02 | 87%                             | 61%     |
| 3  | Peruvoside                                    | 5.3E-03   | 6.8E-03            | 6.1E-03 | 75%                             | 60%     |
| 4  | Proscillaridin A                              | 2.6E-03   | 6.4E-03            | 5.2E-03 | 98%                             | 78%     |
| 5  | Verteporfin                                   | 1.4E+00   | 3.0E-04            | 9.9E+00 | -4%                             | 42%     |
| 6  | Puromycin hydrochloride                       | 1.5E-01   | 6.5E-01            | 9.9E-01 | 100%                            | 114%    |
| 7  | Vincristine sulfate                           | 5.2E-04   | 5.1E-04            | 5.9E-04 | 44%                             | 47%     |
| 8  | Vinblastine sulfate                           | 8.1E-04   | 5.3E-03            | 4.7E-03 | 57%                             | 39%     |
| 9  | Pyrimethamine                                 | 9.4E-01   | 4.9E-02            | 1.0E+01 | 59%                             | 54%     |
| 10 | Pyruvium pamoate                              | 2.4E-02   | 6.3E-02            | 6.0E-01 | 108%                            | 97%     |
| 11 | Aminacrine                                    | 1.6E+00   | 1.4E-04            | 1.7E+01 | 39%                             | 60%     |
| 12 | Niclosamide                                   | 2.9E-01   | 8.3E-01            | 1.1E+00 | 93%                             | 99%     |
| 13 | Mitoxantrone hydrochloride                    | 4.4E-04   | 7.4E-02            | 1.1E+00 | 98%                             | 78%     |
| 14 | Benzalkonium chloride                         | 1.2E+00   | 4.0E+00            | 8.0E+00 | 98%                             | 74%     |
| 15 | Tomatine                                      | 3.6E-02   | 1.3E-01            | 6.7E-01 | 77%                             | 65%     |
| 16 | Thioguanosine                                 | 6.2E-02   | 3.7E-02            | 1.8E-01 | 65%                             | 86%     |
| 17 | Digitonin                                     | 2.6E+00   | 1.1E+01            | 1.5E+01 | 83%                             | 62%     |
| 18 | Digoxigenin                                   | 6.2E-01   | 2.8E+00            | 3.1E+00 | 88%                             | 68%     |
| 19 | Dihydrojasmonic acid                          | 9.9E-02   | 2.7E-01            | 2.2E+00 | 97%                             | 94%     |
| 20 | Celastrol                                     | 1.3E+00   | 3.7E-02            | 6.9E+01 | 87%                             | 61%     |
| 21 | Pomiferin                                     | 2.9E+00   | 4.1E+00            | 7.9E+00 | 92%                             | 77%     |
| 22 | Strophanthidin acid lactone acetate           | 3.7E-02   | 1.1E-01            | 2.7E+00 | 85%                             | 66%     |
| 23 | Anthothecol                                   | 1.9E-01   | 5.9E-01            | 6.5E-01 | 62%                             | 71%     |
| 24 | Camtothecin                                   | 2.6E-03   | 7.4E-03            | 6.6E-02 | 78%                             | 59%     |
| 25 | Strophanthidin                                | 4.3E-02   | 5.5E-02            | 2.0E+00 | 89%                             | 69%     |
| 26 | Sappanone A dimethyl ether                    | 5.2E+00   | 2.3E+01            | 8.2E+02 | 75%                             | 49%     |
| 27 | Lanatoside C                                  | 5.7E-02   | 3.6E-02            | 6.4E-02 | 77%                             | 64%     |
| 28 | Gitoxin                                       | 5.0E-02   | 3.7E-02            | 1.5E+00 | 84%                             | 85%     |
| 29 | 10-hydroxycamptothecin                        | 7.9E-03   | 1.1E-01            | 3.0E+00 | 84%                             | 81%     |
| 30 | Azaguanine-8                                  | 1.0E+00   | 7.9E-06            | 7.9E+01 | 35%                             | 57%     |
| 31 | Triamterene                                   | 9.6E+00   | 1.5E+02            | 3.3E+00 | 64%                             | -21%    |
| 32 | Rotterlin                                     | 8.2E-01   | 2.3E+00            | 3.2E+00 | 76%                             | 74%     |
| 33 | Azathioprine                                  | 4.7E-01   | 6.7E-02            | 4.7E+00 | 61%                             | 73%     |
| 34 | Methotrexate                                  | 3.9E-03   | 3.4E-03            | 9.0E-02 | 44%                             | 58%     |
| 35 | Terfenadine                                   | 2.3E+00   | 3.6E+00            | 4.8E+00 | 121%                            | 112%    |
| 36 | Doxorubicin hydrochloride                     | 8.9E-03   | 4.8E-02            | 7.2E-02 | 83%                             | 70%     |
| 37 | Mercaptopurine                                | 6.6E-01   | 6.2E-02            | 2.0E+00 | 75%                             | 90%     |
| 38 | Auranofin                                     | 2.9E-01   | 1.4E+00            | 4.1E+00 | 102%                            | 111%    |
| 39 | Aminopterin                                   | 3.6E-04   | 2.6E-03            | 4.8E-03 | 44%                             | 95%     |
| 40 | Bay 11-7085                                   | 5.3E+00   | 1.2E+01            | 3.7E+02 | 59%                             | 23%     |
| 41 | Calmidazolium chloride                        | 2.8E+00   | 3.8E+00            | 6.1E+00 | 92%                             | 76%     |
| 42 | Colchicine                                    | 3.4E-03   | 3.4E-03            | 3.7E-03 | 60%                             | 107%    |
| 43 | Diphenyleneiodonium chloride                  | 2.6E-02   | 1.5E-02            | 8.2E+00 | 77%                             | 88%     |
| 44 | Staurosporine aglycone                        | 1.3E+00   | 3.0E+00            | 3.7E+01 | 89%                             | 39%     |
| 45 | BNTX maleate salt hydrate                     | 1.9E+00   | 1.5E-01            | 0.0E+00 | 49%                             | -19%    |
| 46 | Idarubicin                                    | 6.7E-03   | 5.6E-02            | 3.7E-02 | 86%                             | 43%     |
| 47 | Mitoxantrone                                  | 6.5E-03   | 1.7E-02            | 8.9E-01 | 90%                             | 50%     |
| 48 | Nemadipine-A                                  | 5.2E+00   | 1.1E+01            | 3.4E+00 | 72%                             | 35%     |
| 49 | Podophyllotoxin                               | 4.6E-03   | 4.1E-03            | 3.8E-03 | 77%                             | 55%     |
| 50 | ARP 101                                       | 3.5E+00   | 8.3E+00            | 2.4E+02 | 74%                             | 49%     |
| 51 | N-p-Tosyl-L-phenylalanine chloromethyl ketone | 7.0E+00   | 9.1E-04            | 4.2E+02 | -2%                             | 48%     |
| 52 | Tetraethylthiuram disulfide                   | 1.1E+00   | 1.0E+01            | 1.3E+04 | 73%                             | 47%     |
| 53 | NSC348884 hydrate                             | 3.7E+00   | 8.5E+00            | 8.0E+00 | 85%                             | 107%    |
| 54 | LY2183240                                     | 7.1E-01   | 1.6E+02            | 4.4E+01 | 46%                             | 49%     |
| 55 | Ouabain                                       | 6.7E-03   | 7.2E-03            | 2.8E-02 | 97%                             | 73%     |

## SUPPLEMENTAL REFERENCES

1. Sarbassov, D.D.; Ali, S.M., Kim, D. H., Guertin D. A., Latek, R. R., Erdjument-Bromage, H., Tempst, P., Sabatini, D. M. (2004) Rictor, a novel binding partner of mTOR, defines a rapamycin-insensitive and raptor-independent pathway that regulates the cytoskeleton. *Curr Biol* 14, 1296-1302.
2. Jacinto, E., Loewith, R., Schmidt, A., Lin, S., Ruegg, M. A., Hall, A., Hall, M. N. (2004) Mammalian TOR complex 2 controls the actin cytoskeleton and is rapamycin insensitive. *Nat Cell Biol*. 6, 1122-1128.
3. Sarbassov, D. D., Guertin, D. A., Ali, S. M., Sabatini, D. M. (2005) Phosphorylation and regulation of Akt/PKB by the rictor-mTOR complex. *Science*. 307, 1098-1101.
4. Urata, S., Ngo, N., de la Torre, J. C. (2012) The PI3K/Akt pathway contributes to arenavirus budding. *J Virol*. 86, 84578-84585.
5. Shen, L., Dean, N. M., Glazer, R. I. (1999) Induction of p53-dependent, insulin-like growth factor-binding protein-3-mediated apoptosis in glioblastoma multiforme cells by a protein kinase Calpha antisense oligonucleotide. *Mol Pharmacol*. 55, 396-402.
6. Ruvolo, P. P., Deng, X., Carr, B. K., May, W. S. (1998) A functional role for mitochondrial protein kinase Calpha in Bcl2 phosphorylation and suppression of apoptosis. *J Biol Chem*. 273, 25436-25442.
7. Wang, A., Nomura, M., Patan, S., Ware, J. A. (2002) Inhibition of protein kinase Calpha prevents endothelial cell migration and vascular tube formation in vitro and myocardial neovascularization in vivo, *Circ Res* 90, 609-616.
8. Evensen, N. A., Kuscu, C., Nguyen, H. L., Zarrabi, K., Dufour, A., Kadam, P., Hu, Y. J., Pulkoski-Gross, A., Bahou, W. F., Zucker, S., Cao, J. (2013) Unraveling the role of KIAA1199, a novel endoplasmic reticulum protein, in cancer cell migration, *J Natl Cancer Inst* 105. 1402-1416.
9. Chen, L., Xu, B., Liu, L., Liu, C., Luo, Y., Chen, X., Barzegar, M., Chung, J., Huang, S. (2015) Both mTORC1 and mTORC2 are involved in the regulation of cell adhesion. *Oncotarget*. 6, 7136-7150.
10. Xu, H., Czerwinski, P., Hortmann, M., Sohn, H. Y., Foerstermann, U., Li, H. (2008) Protein kinase C alpha promotes angiogenic activity of human endothelial cells via induction of vascular endothelial growth factor. *Cardiovasc Res*. 78, 349-355.
11. St-Denis, A., Chano, F., Tremblay, P., St-Pierre, Y., Descoteaux, A. (1998) Protein kinase C-alpha modulates lipopolysaccharide-induced functions in a murine macrophage cell line. *J Biol Chem*. 273, 32787-32792.
12. Han, Y., Meng, T., Murray, N. R., Fields, A. P., Brasier, A. R. (1999) Interleukin-1-induced nuclear factor-kappaB-IkappaBalpha autoregulatory feedback loop in hepatocytes. A role for protein kinase calpha in post-transcriptional regulation of ikappabalphalpha resynthesis. *J Biol Chem*. 274, 939-947.
13. Aaltonen, V., Koivunen, J., Laato, M., Peltonen, J. (2007) PKC inhibitor Go6976 induces mitosis and enhances doxorubicin-paclitaxel cytotoxicity in urinary bladder carcinoma cells, *Cancer Lett* 253, 97-107.
14. Lawson, N.D. and Weinstein, B.M. (2002). In vivo imaging of embryonic vascular development using transgenic zebrafish. *Dev Biol*. 248, 307-318
15. Kimmel, C.B., Ballard, W.W., Kimmel, S.R., Ullmann, B. Schilling, T.F. (1995). Stages of embryonic development of the zebrafish. *Dev Dyn*. 203,253 -310
